# Supplementary material for: Reduction in Revascularization With Icosapent Ethyl: Insights From REDUCE-IT Revascularization Analyses
Source: PubMed Central journal article supplement — Circulation. 2020 Nov 5;143(1):33–44. doi: 10.1161/CIRCULATIONAHA.120.050276 (PMC7752247; doi:10.1161/circulationaha.120.050276), 2020-11-05
Supplement: cir-143-33-s001.pdf [file cir-143-33-s001.pdf]

## **Supplemental Material**

This appendix has been provided by the authors to give readers additional information about their work.

Supplement to: Peterson BE, Bhatt DL, Steg PG, et. al. Reduction of Revascularization Events in Patients with Hypertriglyceridemia with Icosapent Ethyl: Insights from REDUCE-IT REVASC.

## Contents

|                                                                                                                                                                                                |    |
|------------------------------------------------------------------------------------------------------------------------------------------------------------------------------------------------|----|
| <b>Supplemental Methods for Total Events Analyses.</b> .....                                                                                                                                   | 3  |
| <b>Supplemental Table I. Baseline Demographics (A) and Medications (B) by On-Study Revascularization Status – ITT Population.</b> .....                                                        | 4  |
| A. Baseline Demographics .....                                                                                                                                                                 | 4  |
| B. Baseline Medications .....                                                                                                                                                                  | 8  |
| <b>Supplemental Table II. Time to Coronary Revascularization from Date of Randomization by One Month Increments – ITT Population.</b> .....                                                    | 9  |
| <b>Supplemental Table III. Summary of Recurrences of Coronary Revascularization Endpoint Events Using the Full (A) and Reduced Datasets (B).</b> .....                                         | 11 |
| A. Summary of Recurrences of Coronary Revascularization Using Andersen and Gill Model and Wei-Lin-Weissfeld Model – Full Dataset – ITT Population .....                                        | 11 |
| B. Summary of Recurrences of Coronary Revascularization Using Andersen and Gill Model and Wei-Lin-Weissfeld Model – Reduced Dataset – ITT Population .....                                     | 12 |
| <b>Supplemental Table IV. Summary of EPA Changes Over Time. On Study Positively Adjudicated Coronary Revascularization versus No Revascularization</b> .....                                   | 13 |
| <b>Supplemental Figure I. Kaplan-Meier Curve for Time to Primary Composite Endpoint Excluding Elective Revascularizations that Occurred within 90 Days of Randomization.</b> .....             | 17 |
| <b>Supplemental Figure II. Kaplan-Meier Curve for Time to Primary Composite Endpoint Excluding Elective Revascularizations that Occurred within 30 Days of Randomization.</b> .....            | 18 |
| <b>Supplemental Figure III. Kaplan-Meier Curve for Time to Elective Revascularizations Excluding Elective Events that Occurred within 90 Days of Randomization.</b> .....                      | 19 |
| <b>Supplemental Figure IV. Kaplan-Meier Curve for Time to Elective Revascularization Excluding Elective Events that Occurred within 30 Days of Randomization.</b> .....                        | 20 |
| <b>Supplemental Figure V. Time to Revascularization for the ITT Population and by Baseline Characteristics Subgroups.</b> .....                                                                | 21 |
| <b>Supplemental Figure VI. Distribution of First and Subsequent Coronary Revascularization Events in the Full Dataset for Patients Randomized 1:1 to Icosapent Ethyl Versus Placebo.</b> ..... | 22 |
| <b>Supplemental Figure VII. Comparison of relative risk reductions in revascularization in major clinical trials.</b> .....                                                                    | 23 |

## **Supplemental Methods for Total Events Analyses.**

To improve the performance and validity of our statistical models for total (first and subsequent events), a bundling approach was employed, whereby nonfatal events occurring on the same day as a cardiovascular death were excluded, and at most, one nonfatal event was counted on any given day (e.g., for coronary revascularization occurring after an MI which eventually resulted in the patient's death, only the death would be included). This is referred to as the reduced dataset. Statistical analyses using the full adjudicated endpoint events dataset without exclusions for this bundling approach are referred to as the full dataset.

**Supplemental Table I. Baseline Demographics (A) and Medications (B) by On-Study Revascularization Status – ITT Population.**

A. Baseline Demographics

|                                           | <b>On Study Revasc.<br/>(N=920)</b> | <b>No On Study Revasc.<br/>(N=7259)</b> | <b>Overall<br/>(N=8179)</b> | <b>P-value<sup>[4]</sup></b> |
|-------------------------------------------|-------------------------------------|-----------------------------------------|-----------------------------|------------------------------|
| Age (years) <sup>[1]</sup>                |                                     |                                         |                             | 0.32                         |
| n                                         | 920                                 | 7259                                    | 8179                        |                              |
| Mean (SD)                                 | 63.5 (8.39)                         | 63.4 (8.40)                             | 63.4 (8.40)                 |                              |
| Median                                    | 64.0                                | 64.0                                    | 64.0                        |                              |
| Min, Max                                  | 45.0, 85.0                          | 44.0, 92.0                              | 44.0, 92.0                  |                              |
| Age Group, n (%)                          |                                     |                                         |                             | 0.19                         |
| <65 Years                                 | 478 (52.0%)                         | 3938 (54.2%)                            | 4416 (54.0%)                |                              |
| ≥65 Years                                 | 442 (48.0%)                         | 3321 (45.8%)                            | 3763 (46.0%)                |                              |
| Sex, n (%)                                |                                     |                                         |                             | <0.0001                      |
| Male                                      | 750 (81.5%)                         | 5072 (69.9%)                            | 5822 (71.2%)                |                              |
| Female                                    | 170 (18.5%)                         | 2187 (30.1%)                            | 2357 (28.8%)                |                              |
| Ethnicity, n (%)                          |                                     |                                         |                             | 0.006                        |
| Hispanic Or Latino                        | 23 (2.5%)                           | 322 (4.4%)                              | 345 (4.2%)                  |                              |
| Not Hispanic Or Latino                    | 897 (97.5%)                         | 6937 (95.6%)                            | 7834 (95.8%)                |                              |
| Race, n (%)                               |                                     |                                         |                             | 0.004                        |
| White                                     | 847 (92.1%)                         | 6532 (90.0%)                            | 7379 (90.2%)                |                              |
| Black or African American                 | 18 (2.0%)                           | 140 (1.9%)                              | 158 (1.9%)                  |                              |
| Asian                                     | 32 (3.5%)                           | 414 (5.7%)                              | 446 (5.5%)                  |                              |
| American Indian or Alaska Native          | 4 (0.4%)                            | 25 (0.3%)                               | 29 (0.4%)                   |                              |
| Native Hawaiian or Other Pacific Islander | 1 (0.1%)                            | 9 (0.1%)                                | 10 (0.1%)                   |                              |
| Other                                     | 1 (0.1%)                            | 64 (0.9%)                               | 65 (0.8%)                   |                              |
| Multiple                                  | 17 (1.8%)                           | 74 (1.0%)                               | 91 (1.1%)                   |                              |
| Missing                                   | 0                                   | 1 (0.0%)                                | 1 (0.0%)                    |                              |
| Weight (Kg)                               |                                     |                                         |                             | 0.001                        |
| n                                         | 920                                 | 7238                                    | 8158                        |                              |
| Mean (SD)                                 | 94.8 (17.77)                        | 92.7 (18.46)                            | 93.0 (18.39)                |                              |

|                                     | On Study Revasc.<br>(N=920) | No On Study Revasc.<br>(N=7259) | Overall<br>(N=8179) | P-value <sup>[4]</sup> |
|-------------------------------------|-----------------------------|---------------------------------|---------------------|------------------------|
| Median                              | 93.0                        | 91.0                            | 91.1                |                        |
| Min, Max                            | 49.9, 197.3                 | 40.8, 189.4                     | 40.8, 197.3         |                        |
| Height (cm)                         |                             |                                 |                     | <0.0001                |
| n                                   | 920                         | 7230                            | 8150                |                        |
| Mean (SD)                           | 173.2 (8.89)                | 171.1 (9.76)                    | 171.3 (9.69)        |                        |
| Median                              | 174.0                       | 172.0                           | 172.0               |                        |
| Min, Max                            | 145.4, 199.0                | 137.2, 208.0                    | 137.2, 208.0        |                        |
| BMI (Kg/m <sup>2</sup> )            |                             |                                 |                     | 0.57                   |
| n                                   | 919                         | 7230                            | 8149                |                        |
| Mean (SD)                           | 31.5 (5.13)                 | 31.6 (5.48)                     | 31.6 (5.44)         |                        |
| Median                              | 30.8                        | 30.8                            | 30.8                |                        |
| Min, Max                            | 19.5, 57.4                  | 16.4, 65.0                      | 16.4, 65.0          |                        |
| BMI Group                           |                             |                                 |                     | 0.40                   |
| <25 Kg/m <sup>2</sup>               | 60 (6.5%)                   | 555 (7.6%)                      | 615 (7.5%)          |                        |
| ≥25 to <30 Kg/m <sup>2</sup>        | 331 (36.0%)                 | 2510 (34.6%)                    | 2841 (34.7%)        |                        |
| ≥30 Kg/m <sup>2</sup>               | 528 (57.4%)                 | 4165 (57.4%)                    | 4693 (57.4%)        |                        |
| Missing                             | 1 (0.1%)                    | 29 (0.4%)                       | 30 (0.4%)           |                        |
| Waist Circumference (cm)            |                             |                                 |                     | 0.07                   |
| n                                   | 905                         | 7151                            | 8056                |                        |
| Mean (SD)                           | 107.4 (12.72)               | 106.6 (13.48)                   | 106.7 (13.40)       |                        |
| Median                              | 106.7                       | 105.0                           | 105.4               |                        |
| Min, Max                            | 71.0, 160.0                 | 44.0, 182.9                     | 44.0, 182.9         |                        |
| Geographic Region, n (%)            |                             |                                 |                     | <0.0001                |
| Westernized                         | 769 (83.6%)                 | 5042 (69.5%)                    | 5811 (71.0%)        |                        |
| Non-Westernized <sup>[2]</sup>      | 151 (16.4%)                 | 2217 (30.5%)                    | 2368 (29.0%)        |                        |
| Cardiovascular Risk Category, n (%) |                             |                                 |                     | <0.0001                |
| Established Cardiovascular Disease  | 770 (83.7%)                 | 5015 (69.1%)                    | 5785 (70.7%)        |                        |
| Diabetes plus Risk Factors          | 150 (16.3%)                 | 2244 (30.9%)                    | 2394 (29.3%)        |                        |
| Ezetimibe Use, n (%)                |                             |                                 |                     | 0.0001                 |
| No                                  | 834 (90.7%)                 | 6821 (94.0%)                    | 7655 (93.6%)        |                        |
| Yes                                 | 86 (9.3%)                   | 438 (6.0%)                      | 524 (6.4%)          |                        |

|                                                              | On Study Revasc.<br>(N=920) | No On Study Revasc.<br>(N=7259) | Overall<br>(N=8179) | P-value <sup>[4]</sup> |
|--------------------------------------------------------------|-----------------------------|---------------------------------|---------------------|------------------------|
| Renal Impairment (eGFR<60 ml/min/1.73m <sup>2</sup> ), n (%) |                             |                                 |                     | 0.64                   |
| Yes                                                          | 210 (22.8%)                 | 1606 (22.1%)                    | 1816 (22.2%)        |                        |
| No                                                           | 710 (77.2%)                 | 5647 (77.8%)                    | 6357 (77.7%)        |                        |
| Missing                                                      | 0                           | 6 (0.1%)                        | 6 (0.1%)            |                        |
| Baseline eGFR, n (%)                                         |                             |                                 |                     | 0.10                   |
| <60 mL/min/1.73m <sup>2</sup>                                | 210 (22.8%)                 | 1606 (22.1%)                    | 1816 (22.2%)        |                        |
| ≥60 and <90 mL/min/1.73m <sup>2</sup>                        | 522 (56.7%)                 | 3933 (54.2%)                    | 4455 (54.5%)        |                        |
| ≥90 mL/min/1.73m <sup>2</sup>                                | 188 (20.4%)                 | 1714 (23.6%)                    | 1902 (23.3%)        |                        |
| Missing                                                      | 0                           | 6 (0.1%)                        | 6 (0.1%)            |                        |
| Diabetes, n (%)                                              |                             |                                 |                     | 0.38                   |
| No Diabetes at Baseline                                      | 403 (43.8%)                 | 2986 (41.1%)                    | 3389 (41.4%)        |                        |
| Both Type I and Type II Diabetes                             | 0                           | 1 (0.0%)                        | 1 (0.0%)            |                        |
| Type I Diabetes                                              | 8 (0.9%)                    | 49 (0.7%)                       | 57 (0.7%)           |                        |
| Type II Diabetes                                             | 509 (55.3%)                 | 4220 (58.1%)                    | 4729 (57.8%)        |                        |
| Missing                                                      | 0                           | 3 (0.0%)                        | 3 (0.0%)            |                        |
| Type I or II <sup>[3]</sup>                                  | 517 (56.2%)                 | 4270 (58.8%)                    | 4787 (58.5%)        | 0.84                   |
| BMI <25 Kg/m <sup>2</sup>                                    | 27 (5.2%)                   | 245 (5.7%)                      | 272 (5.7%)          |                        |
| BMI ≥ 25 to <30 Kg/m <sup>2</sup>                            | 151 (29.2%)                 | 1206 (28.2%)                    | 1357 (28.3%)        |                        |
| BMI ≥ 30 Kg/m <sup>2</sup>                                   | 339 (65.6%)                 | 2799 (65.6%)                    | 3138 (65.6%)        |                        |
| BMI Missing                                                  | 0                           | 20 (0.5%)                       | 20 (0.4%)           |                        |
| Hypertension <sup>[5]</sup> , n (%)                          |                             |                                 |                     | 0.48                   |
| Yes                                                          | 790 (85.9%)                 | 6294 (86.7%)                    | 7084 (86.6%)        |                        |
| No                                                           | 130 (14.1%)                 | 965 (13.3%)                     | 1095 (13.4%)        |                        |
| Metabolic Syndrome <sup>[6]</sup> , n (%)                    |                             |                                 |                     | 0.86                   |
| Yes                                                          | 850 (92.4%)                 | 6695 (92.2%)                    | 7545 (92.2%)        |                        |
| No                                                           | 70 (7.6%)                   | 564 (7.8%)                      | 634 (7.8%)          |                        |
| Impaired Glucose Metabolism <sup>[7]</sup> , n (%)           |                             |                                 |                     | 0.33                   |
| Yes                                                          | 348 (37.8%)                 | 2623 (36.1%)                    | 2971 (36.3%)        |                        |
| No                                                           | 572 (62.2%)                 | 4629 (63.8%)                    | 5201 (63.6%)        |                        |
| Missing                                                      | 0                           | 7 (0.1%)                        | 7 (0.1%)            |                        |

|                                                | On Study Revasc.<br>(N=920) | No On Study Revasc.<br>(N=7259) | Overall<br>(N=8179) | P-value <sup>[4]</sup> |
|------------------------------------------------|-----------------------------|---------------------------------|---------------------|------------------------|
| Statin Intensity, n (%)                        |                             |                                 |                     | 0.03                   |
| Low                                            | 52 (5.7%)                   | 469 (6.5%)                      | 521 (6.4%)          |                        |
| Moderate                                       | 548 (59.6%)                 | 4560 (62.8%)                    | 5108 (62.5%)        |                        |
| High                                           | 319 (34.7%)                 | 2197 (30.3%)                    | 2516 (30.8%)        |                        |
| Missing                                        | 1 (0.1%)                    | 33 (0.5%)                       | 34 (0.4%)           |                        |
| hsCRP (mg/L), Median (Q1-Q3)                   | 2.1 (1.1-4.4)               | 2.2 (1.1-4.5)                   | 2.2 (1.1-4.5)       | 0.83                   |
| Triglycerides (mg/dL), Median (Q1-Q3)          | 221.3 (178.5-284.3)         | 215.5 (175.5-271.5)             | 216.0 (176.0-272.5) | 0.02                   |
| HDL-C (mg/dL), Median (Q1-Q3)                  | 39.0 (33.5-44.5)            | 40.0 (35.0-46.0)                | 40.0 (35.0-46.0)    | <0.0001                |
| LDL-C (mg/dL), Median (Q1-Q3)                  | 75.0 (63.0-89.0)            | 75.0 (62.0-89.0)                | 75.0 (62.0-89.0)    | 0.95                   |
| Triglycerides Category                         |                             |                                 |                     | 0.29                   |
| < 150 mg/dL                                    | 90 (9.8%)                   | 751 (10.3%)                     | 841 (10.3%)         |                        |
| 150 - <200 mg/dL                               | 251 (27.3%)                 | 2133 (29.4%)                    | 2384 (29.1%)        |                        |
| ≥ 200 mg/dL                                    | 579 (62.9%)                 | 4371 (60.2%)                    | 4950 (60.5%)        |                        |
| Triglycerides ≥ 200 mg/dL and HDL-C ≤ 35 mg/dL | 222 (24.1%)                 | 1395 (19.2%)                    | 1617 (19.8%)        | 0.0004                 |
| EPA (µg/mL), Median (Q1-Q3)                    | 26.6 (18.0-39.8)            | 26.0 (17.0-40.1)                | 26.1 (17.1-40.0)    | 0.35                   |

Note: Percentages are based on the number of subjects randomized to each treatment group in the ITT population (N) except as noted below.

[1] Age (years) is at Randomization.

[2] Eastern Europe, Asia Pacific.

[3] Percentages are based on the number of subjects with Type 1 or Type 2 diabetes.

[4] To assess balance between treatment groups, p-values are reported from a chi-square test for categorical variables and Wilcoxon test for continuous variables. Missing categories are excluded from any comparisons.

[5] Hypertension as identified on the CRF "Cardiovascular History."

[6] For the diagnosis of metabolic syndrome, refer to Appendix D of the study protocol "Criteria for the diagnosis of metabolic syndrome."

[7] Impaired glucose metabolism is based on Visit 2 FBG of 100-125 mg/dL.

Note: In general, the baseline value is defined as the last non-missing measurement obtained prior to the randomization.

The baseline LDL-C value obtained via Preparative Ultracentrifugation will be used, unless this value is missing. If the LDL-C Preparative Ultracentrifugation value is missing, then another LDL-C value will be used, with prioritization of values obtained from LDL-C Direct measurements, followed by LDL-C derived by the Friedewald calculation (only for subjects with TG < 400 mg/dL), and finally LDL-C derived using the calculation published by Hopkins University investigators (Martin 2013).

For all other lipid and lipoprotein marker parameters, wherever possible, baseline will be derived as the arithmetic mean of the Visit 2 (Day 0) value and the preceding Visit 1 (or Visit 1.1) value. If only one of these values is available, the single available value will be used as baseline.

## B. Baseline Medications

| <b>Medication taken at Baseline</b> | <b>On Study Revasc.<br/>(N=920)</b> | <b>No On Study Revasc.<br/>(N=7259)</b> | <b>p-value<sup>[1]</sup></b> |
|-------------------------------------|-------------------------------------|-----------------------------------------|------------------------------|
| Anti-Diabetes                       | 472 (51.3%)                         | 3914 (53.9%)                            | 0.13                         |
| Anti-Hypertensive                   | 884 (96.1%)                         | 6906 (95.1%)                            | 0.20                         |
| Anti-Platelet                       | 813 (88.4%)                         | 5680 (78.2%)                            | <0.0001                      |
| One Anti-platelet                   | 516 (56.1%)                         | 4308 (59.3%)                            | 0.06                         |
| Two or more Anti-platelets          | 297 (32.3%)                         | 1372 (18.9%)                            | <0.0001                      |
| Anticoagulant                       | 86 (9.3%)                           | 689 (9.5%)                              | 0.89                         |
| Anticoagulant plus Anti-platelet    | 40 (4.3%)                           | 234 (3.2%)                              | 0.07                         |
| No Antithrombotic                   | 61 (6.6%)                           | 1124 (15.5%)                            | <0.0001                      |
| ACE                                 | 452 (49.1%)                         | 3791 (52.2%)                            | 0.08                         |
| ARB                                 | 275 (29.9%)                         | 1929 (26.6%)                            | 0.03                         |
| ACE or ARB                          | 716 (77.8%)                         | 5624 (77.5%)                            | 0.81                         |
| Beta Blockers                       | 701 (76.2%)                         | 5081 (70.0%)                            | <0.0001                      |

Abbreviations: ACE = angiotensin-converting enzyme; ARB = angiotensin receptor blockers.

Note: Percentages are based on the number of subjects in each group (On Study Revasc./No On Study Revasc.) in the ITT population (N).

Note: Dual anti-platelets were classified as such if both components have a robust history of regulatory approval affirming anti-platelet effects, thus excluding combinations where one element lacks robust regulatory approval (e.g. Aspirin + Magnesium Oxide is classified as a single agent because the latter component lacks robust regulatory support as an anti-platelet agent).

[1] To assess balance between groups, p-values comparing 'On Study Revasc.', 'No On Study Revasc.' groups are reported from a chi-square test.



**Supplemental Table II. Time to Coronary Revascularization from Date of Randomization by One Month Increments – ITT Population.**

| <b>Endpoint</b>                   | <b>Icosapent Ethyl<br/>(N=4089)</b> | <b>Placebo<br/>(N=4090)</b> | <b>HR (95% CI)<sup>[1]</sup></b> | <b>Log-Rank<br/>P-value</b> |
|-----------------------------------|-------------------------------------|-----------------------------|----------------------------------|-----------------------------|
| <b>Coronary Revascularization</b> | <b>376 (9.2%)</b>                   | <b>544 (13.3%)</b>          | <b>0.66 (0.58, 0.76)</b>         | <b>&lt;0.0001</b>           |
| 1 Month                           | 7 (0.2%)                            | 11 (0.3%)                   | 0.63 (0.25, 1.64)                | 0.34                        |
| 2 Months                          | 11 (0.3%)                           | 27 (0.7%)                   | 0.41 (0.20, 0.82)                | 0.009                       |
| 3 Months                          | 19 (0.5%)                           | 37 (0.9%)                   | 0.51 (0.29, 0.89)                | 0.02                        |
| 4 Months                          | 26 (0.6%)                           | 40 (1.0%)                   | 0.65 (0.39, 1.06)                | 0.08                        |
| 5 Months                          | 34 (0.8%)                           | 51 (1.2%)                   | 0.66 (0.43, 1.02)                | 0.06                        |
| 6 Months                          | 41 (1.0%)                           | 63 (1.5%)                   | 0.65 (0.44, 0.96)                | 0.03                        |
| 7 Months                          | 49 (1.2%)                           | 73 (1.8%)                   | 0.67 (0.46, 0.96)                | 0.03                        |
| 8 Months                          | 61 (1.5%)                           | 80 (2.0%)                   | 0.75 (0.54, 1.05)                | 0.10                        |
| 9 Months                          | 72 (1.8%)                           | 89 (2.2%)                   | 0.80 (0.59, 1.09)                | 0.16                        |
| 10 Months                         | 77 (1.9%)                           | 97 (2.4%)                   | 0.79 (0.58, 1.06)                | 0.11                        |
| 11 Months                         | 85 (2.1%)                           | 114 (2.8%)                  | 0.74 (0.56, 0.98)                | 0.03                        |
| 12 Months                         | 96 (2.3%)                           | 125 (3.1%)                  | 0.76 (0.58, 0.99)                | 0.04                        |
| 13 Months                         | 106 (2.6%)                          | 138 (3.4%)                  | 0.76 (0.59, 0.98)                | 0.03                        |
| 14 Months                         | 110 (2.7%)                          | 150 (3.7%)                  | 0.72 (0.57, 0.93)                | 0.01                        |
| 15 Months                         | 119 (2.9%)                          | 161 (3.9%)                  | 0.73 (0.58, 0.93)                | 0.01                        |
| 16 Months                         | 128 (3.1%)                          | 171 (4.2%)                  | 0.74 (0.59, 0.93)                | 0.01                        |
| 17 Months                         | 136 (3.3%)                          | 185 (4.5%)                  | 0.73 (0.58, 0.91)                | 0.004                       |
| 18 Months                         | 141 (3.4%)                          | 197 (4.8%)                  | 0.71 (0.57, 0.88)                | 0.002                       |
| 19 Months                         | 150 (3.7%)                          | 203 (5.0%)                  | 0.73 (0.59, 0.90)                | 0.003                       |
| 20 Months                         | 159 (3.9%)                          | 208 (5.1%)                  | 0.76 (0.61, 0.93)                | 0.008                       |
| 21 Months                         | 165 (4.0%)                          | 222 (5.4%)                  | 0.73 (0.60, 0.90)                | 0.003                       |
| 22 Months                         | 173 (4.2%)                          | 235 (5.7%)                  | 0.73 (0.60, 0.89)                | 0.001                       |
| 23 Months                         | 180 (4.4%)                          | 247 (6.0%)                  | 0.72 (0.59, 0.87)                | 0.0007                      |
| 24 Months                         | 182 (4.5%)                          | 257 (6.3%)                  | 0.70 (0.58, 0.84)                | 0.0002                      |
| 25 Months                         | 195 (4.8%)                          | 272 (6.7%)                  | 0.71 (0.59, 0.85)                | 0.0002                      |
| 26 Months                         | 199 (4.9%)                          | 280 (6.8%)                  | 0.70 (0.58, 0.84)                | 0.0001                      |
| 27 Months                         | 207 (5.1%)                          | 292 (7.1%)                  | 0.70 (0.58, 0.83)                | <0.0001                     |
| 28 Months                         | 217 (5.3%)                          | 302 (7.4%)                  | 0.71 (0.59, 0.84)                | <0.0001                     |
| 29 Months                         | 225 (5.5%)                          | 311 (7.6%)                  | 0.71 (0.60, 0.84)                | <0.0001                     |
| 30 Months                         | 228 (5.6%)                          | 318 (7.8%)                  | 0.70 (0.59, 0.84)                | <0.0001                     |
| 31 Months                         | 232 (5.7%)                          | 331 (8.1%)                  | 0.69 (0.58, 0.81)                | <0.0001                     |
| 32 Months                         | 240 (5.9%)                          | 344 (8.4%)                  | 0.68 (0.58, 0.81)                | <0.0001                     |
| 33 Months                         | 246 (6.0%)                          | 348 (8.5%)                  | 0.69 (0.59, 0.82)                | <0.0001                     |
| 34 Months                         | 249 (6.1%)                          | 359 (8.8%)                  | 0.68 (0.58, 0.80)                | <0.0001                     |
| 35 Months                         | 256 (6.3%)                          | 367 (9.0%)                  | 0.68 (0.58, 0.80)                | <0.0001                     |
| 36 Months                         | 266 (6.5%)                          | 376 (9.2%)                  | 0.69 (0.59, 0.81)                | <0.0001                     |
| 37 Months                         | 273 (6.7%)                          | 385 (9.4%)                  | 0.69 (0.59, 0.81)                | <0.0001                     |
| 38 Months                         | 277 (6.8%)                          | 390 (9.5%)                  | 0.69 (0.59, 0.81)                | <0.0001                     |
| 39 Months                         | 280 (6.8%)                          | 397 (9.7%)                  | 0.69 (0.59, 0.80)                | <0.0001                     |
| 40 Months                         | 283 (6.9%)                          | 407 (10.0%)                 | 0.68 (0.58, 0.79)                | <0.0001                     |
| 41 Months                         | 285 (7.0%)                          | 413 (10.1%)                 | 0.67 (0.58, 0.78)                | <0.0001                     |
| 42 Months                         | 292 (7.1%)                          | 419 (10.2%)                 | 0.68 (0.58, 0.79)                | <0.0001                     |

| Endpoint                          | Icosapent Ethyl<br>(N=4089) | Placebo<br>(N=4090) | HR (95% CI) <sup>[1]</sup> | Log-Rank<br>P-value |
|-----------------------------------|-----------------------------|---------------------|----------------------------|---------------------|
| <b>Coronary Revascularization</b> | <b>376 (9.2%)</b>           | <b>544 (13.3%)</b>  | <b>0.66 (0.58, 0.76)</b>   | <b>&lt;0.0001</b>   |
| 43 Months                         | 293 (7.2%)                  | 427 (10.4%)         | 0.67 (0.58, 0.78)          | <0.0001             |
| 44 Months                         | 300 (7.3%)                  | 436 (10.7%)         | 0.67 (0.58, 0.78)          | <0.0001             |
| 45 Months                         | 307 (7.5%)                  | 447 (10.9%)         | 0.67 (0.58, 0.77)          | <0.0001             |
| 46 Months                         | 313 (7.7%)                  | 454 (11.1%)         | 0.67 (0.58, 0.77)          | <0.0001             |
| 47 Months                         | 314 (7.7%)                  | 464 (11.3%)         | 0.66 (0.57, 0.76)          | <0.0001             |
| 48 Months                         | 318 (7.8%)                  | 469 (11.5%)         | 0.66 (0.57, 0.76)          | <0.0001             |
| 49 Months                         | 324 (7.9%)                  | 477 (11.7%)         | 0.66 (0.57, 0.76)          | <0.0001             |
| 50 Months                         | 327 (8.0%)                  | 487 (11.9%)         | 0.65 (0.56, 0.75)          | <0.0001             |
| 51 Months                         | 333 (8.1%)                  | 498 (12.2%)         | 0.65 (0.56, 0.74)          | <0.0001             |
| 52 Months                         | 333 (8.1%)                  | 503 (12.3%)         | 0.64 (0.56, 0.73)          | <0.0001             |
| 53 Months                         | 339 (8.3%)                  | 505 (12.3%)         | 0.65 (0.56, 0.74)          | <0.0001             |
| 54 Months                         | 344 (8.4%)                  | 510 (12.5%)         | 0.65 (0.57, 0.75)          | <0.0001             |
| 55 Months                         | 346 (8.5%)                  | 513 (12.5%)         | 0.65 (0.57, 0.75)          | <0.0001             |
| 56 Months                         | 349 (8.5%)                  | 517 (12.6%)         | 0.65 (0.57, 0.75)          | <0.0001             |
| 57 Months                         | 351 (8.6%)                  | 521 (12.7%)         | 0.65 (0.57, 0.74)          | <0.0001             |
| 58 Months                         | 357 (8.7%)                  | 523 (12.8%)         | 0.66 (0.57, 0.75)          | <0.0001             |
| 59 Months                         | 360 (8.8%)                  | 524 (12.8%)         | 0.66 (0.58, 0.76)          | <0.0001             |
| 60 Months                         | 362 (8.9%)                  | 528 (12.9%)         | 0.66 (0.58, 0.75)          | <0.0001             |
| 61 Months                         | 365 (8.9%)                  | 533 (13.0%)         | 0.66 (0.58, 0.75)          | <0.0001             |
| 62 Months                         | 368 (9.0%)                  | 535 (13.1%)         | 0.66 (0.58, 0.76)          | <0.0001             |
| 63 Months                         | 370 (9.0%)                  | 536 (13.1%)         | 0.66 (0.58, 0.76)          | <0.0001             |
| 64 Months                         | 372 (9.1%)                  | 537 (13.1%)         | 0.67 (0.58, 0.76)          | <0.0001             |
| 65 Months                         | 373 (9.1%)                  | 537 (13.1%)         | 0.67 (0.59, 0.76)          | <0.0001             |
| 66 Months                         | 374 (9.1%)                  | 540 (13.2%)         | 0.67 (0.58, 0.76)          | <0.0001             |
| 67 Months                         | 374 (9.1%)                  | 542 (13.3%)         | 0.66 (0.58, 0.76)          | <0.0001             |
| 68 Months                         | 375 (9.2%)                  | 543 (13.3%)         | 0.66 (0.58, 0.76)          | <0.0001             |
| 69 Months                         | 375 (9.2%)                  | 543 (13.3%)         | 0.66 (0.58, 0.76)          | <0.0001             |
| 70 Months                         | 375 (9.2%)                  | 543 (13.3%)         | 0.66 (0.58, 0.76)          | <0.0001             |
| 71 Months                         | 375 (9.2%)                  | 543 (13.3%)         | 0.66 (0.58, 0.76)          | <0.0001             |
| 72 Months                         | 375 (9.2%)                  | 543 (13.3%)         | 0.66 (0.58, 0.76)          | <0.0001             |
| 73 Months                         | 375 (9.2%)                  | 544 (13.3%)         | 0.66 (0.58, 0.76)          | <0.0001             |
| 74 Months                         | 375 (9.2%)                  | 544 (13.3%)         | 0.66 (0.58, 0.76)          | <0.0001             |
| 75 Months                         | 376 (9.2%)                  | 544 (13.3%)         | 0.66 (0.58, 0.76)          | <0.0001             |

Note: Events that occurred after the timepoint are censored to the timepoint.

[1] Hazard ratio, 95% CI are from a Cox proportional hazard model with treatment as factor and stratified by geographic region, CV risk category, and use of ezetimibe.

**Supplemental Table III. Summary of Recurrences of Coronary Revascularization Endpoint Events Using the Full (A) and Reduced Datasets (B).**

A. Summary of Recurrences of Coronary Revascularization Using Andersen and Gill Model and Wei-Lin-Weissfeld Model – Full Dataset – ITT Population

|                            | <b>Icosapent Ethyl<br/>(N=4089)</b> |                        | <b>Placebo<br/>(N=4090)</b> |                        |
|----------------------------|-------------------------------------|------------------------|-----------------------------|------------------------|
| <b>Analysis</b>            | <b>Event (%)</b>                    | <b>Rate/1000 pt-yr</b> | <b>Event (%)</b>            | <b>Rate/1000 pt-yr</b> |
| Coronary Revascularization |                                     |                        |                             |                        |
| 1st occurrence event       | 376 (9.20)                          | 22.50                  | 544 (13.30)                 | 33.67                  |
| 2nd occurrence event       | 66 (1.61)                           | 3.77                   | 130 (3.18)                  | 7.57                   |
| 3rd occurrence event       | 14 (0.34)                           | 0.80                   | 38 (0.93)                   | 2.19                   |
| 4th occurrence event       | 8 (0.20)                            | 0.45                   | 11 (0.27)                   | 0.63                   |
| 5th occurrence event       | 3 (0.07)                            | 0.17                   | 4 (0.10)                    | 0.23                   |
| 6th occurrence event       | 2 (0.05)                            | 0.11                   | 2 (0.05)                    | 0.11                   |
| 7th occurrence event       | 2 (0.05)                            | 0.11                   | 2 (0.05)                    | 0.11                   |
| 8th occurrence event       | 1 (0.02)                            | 0.06                   | NA                          | NA                     |
| 9th occurrence event       | 1 (0.02)                            | 0.06                   | NA                          | NA                     |

Note: The number of subjects with events in the ITT Population within each treatment group (n). The number of subjects in the ITT Population within each treatment group (N). Rate per 1000 patient years (pt-yrs) is  $1000 \times n/pt\text{-yrs}$ .

|                                                           | <b>Treatment Comparison (Icosapent Ethyl /Placebo)</b> |                             |                              |
|-----------------------------------------------------------|--------------------------------------------------------|-----------------------------|------------------------------|
| <b>Analysis</b>                                           | <b>HR<sup>[1]</sup></b>                                | <b>95% CI<sup>[1]</sup></b> | <b>P-value<sup>[1]</sup></b> |
| Andersen and Gill (AG) Model and Proportional Means Model |                                                        |                             |                              |
| Intensity Model (AG Model)                                | 0.64                                                   | (0.57, 0.71)                | <0.0001                      |
| Proportional Means Model                                  | 0.64                                                   | (0.55, 0.73)                | <0.0001                      |
| Modified Wei-Lin-Weissfeld Model                          |                                                        |                             |                              |
| Noncommon effects, 1st occurrence event                   | 0.67                                                   | (0.58, 0.76)                | <0.0001                      |
| Noncommon effects, 2nd occurrence event                   | 0.49                                                   | (0.37, 0.66)                | <0.0001                      |
| Noncommon effects, 3rd occurrence event                   | 0.36                                                   | (0.19, 0.66)                | 0.001                        |
| Noncommon effects, 4th occurrence event                   | 0.71                                                   | (0.29, 1.77)                | 0.47                         |
| Noncommon effects, 5th occurrence event                   | 0.73                                                   | (0.16, 3.26)                | 0.68                         |
| Noncommon effects, 6th occurrence event                   | 0.97                                                   | (0.14, 6.92)                | 0.98                         |
| Noncommon effects, 7th occurrence event                   | 0.97                                                   | (0.14, 6.90)                | 0.98                         |

Note:

[1]Hazard ratio and its 95% CI, and p-value are reported from Andersen & Gill (1982) model for common effect and Wei-Lin-Weissfeld Model for noncommon effects respectively, with treatment as the covariate, and stratified by geographic region, CV risk category, and use of ezetimibe.

B. Summary of Recurrences of Coronary Revascularization Using Andersen and Gill Model and Wei-Lin-Weissfeld Model – Reduced Dataset – ITT Population

| Analysis                   | Icosapent Ethyl<br>(N=4089) |                 | Placebo<br>(N=4090) |                 |
|----------------------------|-----------------------------|-----------------|---------------------|-----------------|
|                            | Event (%)                   | Rate/1000 pt-yr | Event (%)           | Rate/1000 pt-yr |
| Coronary Revascularization |                             |                 |                     |                 |
| 1st occurrence event       | 376 (9.20)                  | 22.50           | 544 (13.30)         | 33.67           |
| 2nd occurrence event       | 64 (1.57)                   | 3.66            | 128 (3.13)          | 7.45            |
| 3rd occurrence event       | 13 (0.32)                   | 0.74            | 38 (0.93)           | 2.19            |
| 4th occurrence event       | 8 (0.20)                    | 0.45            | 10 (0.24)           | 0.58            |
| 5th occurrence event       | 3 (0.07)                    | 0.17            | 4 (0.10)            | 0.23            |
| 6th occurrence event       | 2 (0.05)                    | 0.11            | 2 (0.05)            | 0.11            |
| 7th occurrence event       | 2 (0.05)                    | 0.11            | 2 (0.05)            | 0.11            |
| 8th occurrence event       | 1 (0.02)                    | 0.06            | NA                  | NA              |

Note: The number of subjects with events in the ITT Population within each treatment group (n). The number of subjects in the ITT Population within each treatment group (N). Rate per 1000 patient years (pt-yrs) is  $1000 \times n/\text{pt-yrs}$ .

| Analysis                                                  | Treatment Comparison (Icosapent Ethyl/Placebo) |                       |                        |
|-----------------------------------------------------------|------------------------------------------------|-----------------------|------------------------|
|                                                           | HR <sup>[1]</sup>                              | 95% CI <sup>[1]</sup> | P-value <sup>[1]</sup> |
| Andersen and Gill (AG) Model and Proportional Means Model |                                                |                       |                        |
| Intensity Model (AG Model)                                | 0.64                                           | (0.57, 0.71)          | <0.0001                |
| Proportional Means Model                                  | 0.64                                           | (0.55, 0.73)          | <0.0001                |
| Modified Wei-Lin-Weissfeld Model                          |                                                |                       |                        |
| Noncommon effects, 1st occurrence event                   | 0.67                                           | (0.58, 0.76)          | <0.0001                |
| Noncommon effects, 2nd occurrence event                   | 0.49                                           | (0.36, 0.66)          | <0.0001                |
| Noncommon effects, 3rd occurrence event                   | 0.33                                           | (0.18, 0.63)          | 0.0006                 |
| Noncommon effects, 4th occurrence event                   | 0.79                                           | (0.31, 1.99)          | 0.61                   |
| Noncommon effects, 5th occurrence event                   | 0.73                                           | (0.16, 3.26)          | 0.68                   |
| Noncommon effects, 6th occurrence event                   | 0.97                                           | (0.14, 6.91)          | 0.98                   |
| Noncommon effects, 7th occurrence event                   | 0.91                                           | (0.13, 6.50)          | 0.93                   |

Note:

[1]Hazard ratio and its 95% CI, and p-value are reported from Andersen & Gill (1982) model for common effect and Wei-Lin-Weissfeld Model for noncommon effects respectively, with treatment as the covariate, and stratified by geographic region, CV risk category, and use of ezetimibe.

**Supplemental Table IV. Summary of EPA Changes Over Time. On Study Positively Adjudicated Coronary Revascularization versus No Revascularization**

| Visit/Change/Statistic         | Revascularization<br>(N=920) | No Revascularization<br>(N=7259) | Group difference<br>(Revascularization-No<br>Revascularization) |                       |                        |
|--------------------------------|------------------------------|----------------------------------|-----------------------------------------------------------------|-----------------------|------------------------|
|                                |                              |                                  | Median <sup>[1]</sup>                                           | 95% CI <sup>[1]</sup> | P-value <sup>[2]</sup> |
| Visit 2 - Day 0: Randomization |                              |                                  |                                                                 |                       |                        |
| Observed Values                |                              |                                  |                                                                 |                       |                        |
| n                              | 824                          | 6238                             |                                                                 |                       |                        |
| Mean (SD)                      | 32.0 (21.95)                 | 32.4 (26.32)                     |                                                                 |                       |                        |
| Median (Q1, Q3)                | 26.6 (18.0, 39.8)            | 26.0 (17.0, 40.1)                | 0.5                                                             | (-0.6, 1.7)           | 0.35                   |
| IQR                            | 21.8                         | 23.1                             |                                                                 |                       |                        |
| CV%                            | 68.6                         | 81.2                             |                                                                 |                       |                        |
| Visit 4 - Day 360              |                              |                                  |                                                                 |                       |                        |
| Observed Values                |                              |                                  |                                                                 |                       |                        |
| n                              | 763                          | 5542                             |                                                                 |                       |                        |
| Mean (SD)                      | 81.6 (89.95)                 | 91.5 (89.95)                     |                                                                 |                       |                        |
| Median (Q1, Q3)                | 37.4 (19.3, 129.0)           | 50.9 (20.8, 150.0)               |                                                                 |                       |                        |
| IQR                            | 109.7                        | 129.2                            |                                                                 |                       |                        |
| CV%                            | 110.2                        | 98.3                             |                                                                 |                       |                        |
| Change from Baseline           |                              |                                  |                                                                 |                       |                        |
| n                              | 714                          | 5168                             |                                                                 |                       |                        |
| Mean (SD)                      | 50.1 (90.56)                 | 59.0 (89.93)                     |                                                                 |                       |                        |
| Median (Q1, Q3)                | 5.9 (-6.5, 98.8)             | 15.5 (-4.7, 119.0)               | -5.0                                                            | (-8.1, -2.0)          | 0.001                  |
| IQR                            | 105.3                        | 123.7                            |                                                                 |                       |                        |
| CV%                            | 180.9                        | 152.5                            |                                                                 |                       |                        |
| P-value <sup>[3]</sup>         | <0.0001                      | <0.0001                          |                                                                 |                       |                        |
| Percent Change from Baseline   |                              |                                  |                                                                 |                       |                        |
| n                              | 714                          | 5168                             |                                                                 |                       |                        |
| Mean (SD)                      | 260.2 (725.23)               | 293.9 (581.40)                   |                                                                 |                       |                        |
| Median (Q1, Q3)                | 31.2 (-24.6, 308.8)          | 68.4 (-19.6, 425.3)              | -16.5                                                           | (-26.9, -6.6)         | 0.001                  |
| IQR                            | 333.4                        | 444.9                            |                                                                 |                       |                        |
| CV%                            | 278.7                        | 197.8                            |                                                                 |                       |                        |
| P-value <sup>[3]</sup>         | <0.0001                      | <0.0001                          |                                                                 |                       |                        |
| Visit 5 - Day 720              |                              |                                  |                                                                 |                       |                        |
| Observed Values                |                              |                                  |                                                                 |                       |                        |
| n                              | 728                          | 5207                             |                                                                 |                       |                        |
| Mean (SD)                      | 91.8 (101.94)                | 106.5 (103.97)                   |                                                                 |                       |                        |
| Median (Q1, Q3)                | 42.0 (23.2, 142.0)           | 55.0 (25.2, 176.0)               |                                                                 |                       |                        |
| IQR                            | 118.8                        | 150.8                            |                                                                 |                       |                        |
| CV%                            | 111.0                        | 97.6                             |                                                                 |                       |                        |
| Change from Baseline           |                              |                                  |                                                                 |                       |                        |
| n                              | 680                          | 4808                             |                                                                 |                       |                        |
| Mean (SD)                      | 60.1 (101.30)                | 72.9 (102.24)                    |                                                                 |                       |                        |

| Visit/Change/Statistic       | Revascularization<br>(N=920) | No Revascularization<br>(N=7259) | Group difference<br>(Revascularization-No<br>Revascularization) |                       |                        |
|------------------------------|------------------------------|----------------------------------|-----------------------------------------------------------------|-----------------------|------------------------|
|                              |                              |                                  | Median <sup>[1]</sup>                                           | 95% CI <sup>[1]</sup> | P-value <sup>[2]</sup> |
| Median (Q1, Q3)              | 9.9 (-2.1, 110.9)            | 19.2 (-1.2, 143.8)               | -4.8                                                            | (-8.2, -1.7)          | 0.002                  |
| IQR                          | 113.0                        | 145.0                            |                                                                 |                       |                        |
| CV%                          | 168.7                        | 140.3                            |                                                                 |                       |                        |
| P-value <sup>[3]</sup>       | <0.0001                      | <0.0001                          |                                                                 |                       |                        |
| Percent Change from Baseline |                              |                                  |                                                                 |                       |                        |
| n                            | 680                          | 4808                             |                                                                 |                       |                        |
| Mean (SD)                    | 275.3 (571.65)               | 345.3 (647.49)                   |                                                                 |                       |                        |
| Median (Q1, Q3)              | 45.3 (-7.9, 403.1)           | 87.8 (-5.0, 514.2)               | -17.4                                                           | (-29.1, -6.4)         | 0.002                  |
| IQR                          | 411.0                        | 519.2                            |                                                                 |                       |                        |
| CV%                          | 207.7                        | 187.5                            |                                                                 |                       |                        |
| P-value <sup>[3]</sup>       | <0.0001                      | <0.0001                          |                                                                 |                       |                        |
| Visit 6 - Day 1080           |                              |                                  |                                                                 |                       |                        |
| Observed Values              |                              |                                  |                                                                 |                       |                        |
| n                            | 618                          | 4376                             |                                                                 |                       |                        |
| Mean (SD)                    | 91.3 (104.92)                | 103.6 (103.00)                   |                                                                 |                       |                        |
| Median (Q1, Q3)              | 42.0 (22.4, 138.0)           | 53.1 (24.5, 173.0)               |                                                                 |                       |                        |
| IQR                          | 115.6                        | 148.5                            |                                                                 |                       |                        |
| CV%                          | 114.9                        | 99.4                             |                                                                 |                       |                        |
| Change from Baseline         |                              |                                  |                                                                 |                       |                        |
| n                            | 579                          | 4031                             |                                                                 |                       |                        |
| Mean (SD)                    | 59.3 (105.77)                | 70.7 (101.87)                    |                                                                 |                       |                        |
| Median (Q1, Q3)              | 9.3 (-3.9, 107.6)            | 16.9 (-2.1, 140.3)               | -5.2                                                            | (-8.7, -1.9)          | 0.002                  |
| IQR                          | 111.5                        | 142.4                            |                                                                 |                       |                        |
| CV%                          | 178.4                        | 144.1                            |                                                                 |                       |                        |
| P-value <sup>[3]</sup>       | <0.0001                      | <0.0001                          |                                                                 |                       |                        |
| Percent Change from Baseline |                              |                                  |                                                                 |                       |                        |
| n                            | 579                          | 4031                             |                                                                 |                       |                        |
| Mean (SD)                    | 258.7 (513.74)               | 342.8 (714.01)                   |                                                                 |                       |                        |
| Median (Q1, Q3)              | 39.0 (-14.6, 346.8)          | 77.3 (-8.4, 496.2)               | -19.7                                                           | (-31.8, -8.3)         | 0.0006                 |
| IQR                          | 361.4                        | 504.6                            |                                                                 |                       |                        |
| CV%                          | 198.6                        | 208.3                            |                                                                 |                       |                        |
| P-value <sup>[3]</sup>       | <0.0001                      | <0.0001                          |                                                                 |                       |                        |
| Visit 7 - Day 1440           |                              |                                  |                                                                 |                       |                        |
| Observed Values              |                              |                                  |                                                                 |                       |                        |
| n                            | 526                          | 3707                             |                                                                 |                       |                        |
| Mean (SD)                    | 84.8 (90.11)                 | 102.3 (102.53)                   |                                                                 |                       |                        |
| Median (Q1, Q3)              | 42.7 (20.7, 129.0)           | 50.9 (23.6, 168.0)               |                                                                 |                       |                        |
| IQR                          | 108.3                        | 144.4                            |                                                                 |                       |                        |
| CV%                          | 106.2                        | 100.2                            |                                                                 |                       |                        |
| Change from Baseline         |                              |                                  |                                                                 |                       |                        |
| n                            | 490                          | 3381                             |                                                                 |                       |                        |
| Mean (SD)                    | 52.3 (90.40)                 | 69.4 (101.97)                    |                                                                 |                       |                        |
| Median (Q1, Q3)              | 7.9 (-5.7, 100.7)            | 15.5 (-3.0, 138.7)               | -6.6                                                            | (-10.3, -3.0)         | 0.0002                 |

| Visit/Change/Statistic       | Revascularization<br>(N=920) | No Revascularization<br>(N=7259) | Group difference<br>(Revascularization-No<br>Revascularization) |                       |                        |
|------------------------------|------------------------------|----------------------------------|-----------------------------------------------------------------|-----------------------|------------------------|
|                              |                              |                                  | Median <sup>[1]</sup>                                           | 95% CI <sup>[1]</sup> | P-value <sup>[2]</sup> |
| IQR                          | 106.4                        | 141.7                            |                                                                 |                       |                        |
| CV%                          | 172.8                        | 146.8                            |                                                                 |                       |                        |
| P-value <sup>[3]</sup>       | <0.0001                      | <0.0001                          |                                                                 |                       |                        |
| Percent Change from Baseline |                              |                                  |                                                                 |                       |                        |
| n                            | 490                          | 3381                             |                                                                 |                       |                        |
| Mean (SD)                    | 230.1 (421.10)               | 335.9 (668.56)                   |                                                                 |                       |                        |
| Median (Q1, Q3)              | 33.7 (-21.4, 315.8)          | 75.5 (-12.6, 498.4)              | -23.3                                                           | (-36.2, -11.3)        | 0.0001                 |
| IQR                          | 337.2                        | 511.0                            |                                                                 |                       |                        |
| CV%                          | 183.0                        | 199.0                            |                                                                 |                       |                        |
| P-value <sup>[3]</sup>       | <0.0001                      | <0.0001                          |                                                                 |                       |                        |
| Visit 8 - Day 1800           |                              |                                  |                                                                 |                       |                        |
| Observed Values              |                              |                                  |                                                                 |                       |                        |
| n                            | 286                          | 2075                             |                                                                 |                       |                        |
| Mean (SD)                    | 84.9 (96.68)                 | 99.3 (97.48)                     |                                                                 |                       |                        |
| Median (Q1, Q3)              | 36.3 (20.1, 139.0)           | 49.8 (22.8, 168.0)               |                                                                 |                       |                        |
| IQR                          | 118.9                        | 145.2                            |                                                                 |                       |                        |
| CV%                          | 113.9                        | 98.1                             |                                                                 |                       |                        |
| Change from Baseline         |                              |                                  |                                                                 |                       |                        |
| n                            | 266                          | 1856                             |                                                                 |                       |                        |
| Mean (SD)                    | 53.6 (95.46)                 | 67.8 (96.97)                     |                                                                 |                       |                        |
| Median (Q1, Q3)              | 6.0 (-6.6, 109.0)            | 15.4 (-2.4, 136.3)               | -7.0                                                            | (-11.7, -2.6)         | 0.002                  |
| IQR                          | 115.6                        | 138.7                            |                                                                 |                       |                        |
| CV%                          | 178.1                        | 143.0                            |                                                                 |                       |                        |
| P-value <sup>[3]</sup>       | <0.0001                      | <0.0001                          |                                                                 |                       |                        |
| Percent Change from Baseline |                              |                                  |                                                                 |                       |                        |
| n                            | 266                          | 1856                             |                                                                 |                       |                        |
| Mean (SD)                    | 231.0 (417.76)               | 329.7 (593.47)                   |                                                                 |                       |                        |
| Median (Q1, Q3)              | 29.9 (-25.7, 331.8)          | 69.7 (-10.5, 513.1)              | -24.5                                                           | (-41.3, -9.1)         | 0.002                  |
| IQR                          | 357.5                        | 523.7                            |                                                                 |                       |                        |
| CV%                          | 180.9                        | 180.0                            |                                                                 |                       |                        |

| Visit/Change/Statistic       | Revascularization<br>(N=920) | No Revascularization<br>(N=7259) | Group difference<br>(Revascularization-No<br>Revascularization) |                       |                        |
|------------------------------|------------------------------|----------------------------------|-----------------------------------------------------------------|-----------------------|------------------------|
|                              |                              |                                  | Median <sup>[1]</sup>                                           | 95% CI <sup>[1]</sup> | P-value <sup>[2]</sup> |
| P-value <sup>[3]</sup>       | <0.0001                      | <0.0001                          |                                                                 |                       |                        |
| Last Visit                   |                              |                                  |                                                                 |                       |                        |
| Observed Values              |                              |                                  |                                                                 |                       |                        |
| n                            | 650                          | 4827                             |                                                                 |                       |                        |
| Mean (SD)                    | 82.4 (95.93)                 | 96.9 (99.04)                     |                                                                 |                       |                        |
| Median (Q1, Q3)              | 37.3 (20.7, 114.0)           | 46.6 (23.2, 161.0)               |                                                                 |                       |                        |
| IQR                          | 93.3                         | 137.8                            |                                                                 |                       |                        |
| CV%                          | 116.5                        | 102.2                            |                                                                 |                       |                        |
| Change from Baseline         |                              |                                  |                                                                 |                       |                        |
| n                            | 605                          | 4430                             |                                                                 |                       |                        |
| Mean (SD)                    | 50.3 (96.13)                 | 63.2 (99.56)                     |                                                                 |                       |                        |
| Median (Q1, Q3)              | 6.1 (-5.4, 89.3)             | 12.4 (-3.7, 129.6)               | -5.2                                                            | (-8.3, -2.3)          | 0.0005                 |
| IQR                          | 94.7                         | 133.3                            |                                                                 |                       |                        |
| CV%                          | 191.1                        | 157.4                            |                                                                 |                       |                        |
| P-value <sup>[3]</sup>       | <0.0001                      | <0.0001                          |                                                                 |                       |                        |
| Percent Change from Baseline |                              |                                  |                                                                 |                       |                        |
| n                            | 605                          | 4430                             |                                                                 |                       |                        |
| Mean (SD)                    | 219.9 (438.30)               | 309.3 (652.38)                   |                                                                 |                       |                        |
| Median (Q1, Q3)              | 29.0 (-19.3, 311.2)          | 58.1 (-13.8, 438.0)              | -16.4                                                           | (-26.9, -6.5)         | 0.001                  |
| IQR                          | 330.5                        | 451.7                            |                                                                 |                       |                        |
| CV%                          | 199.3                        | 210.9                            |                                                                 |                       |                        |
| P-value <sup>[3]</sup>       | <0.0001                      | <0.0001                          |                                                                 |                       |                        |

[1] Based on Hodges-Lehmann Estimation

[2] P-Value from Wilcoxon rank-sum test

[3] P-value from Wilcoxon Signed-Rank test



**Supplemental Figure I. Kaplan-Meier Curve for Time to Primary Composite Endpoint Excluding Elective Revascularizations that Occurred within 90 Days of Randomization.**

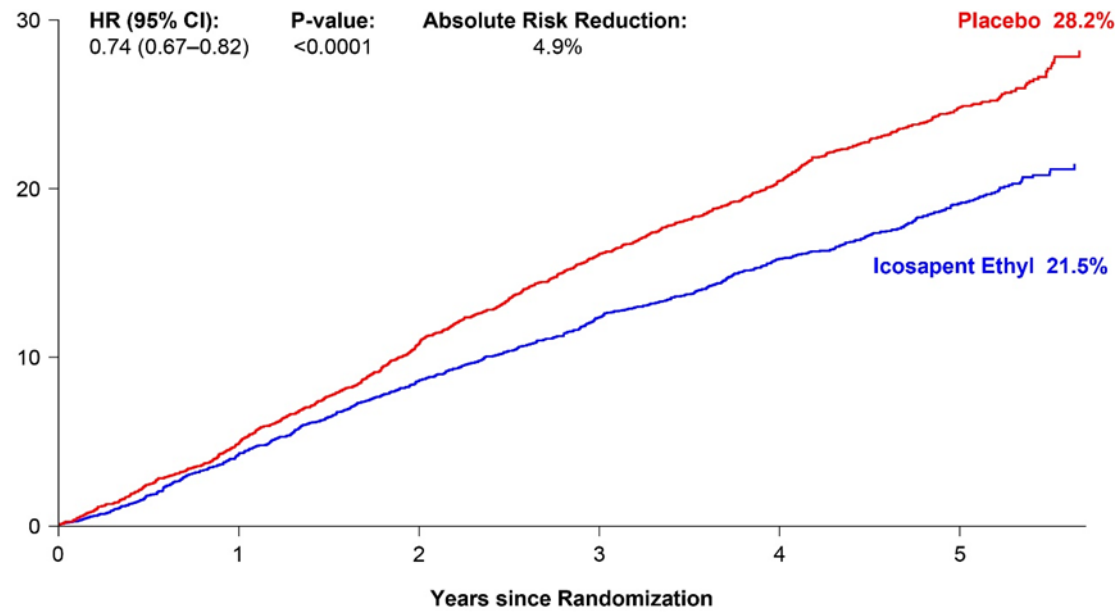

**No. at Risk**

|                 |      |      |      |      |      |      |
|-----------------|------|------|------|------|------|------|
| Placebo         | 4090 | 3750 | 3334 | 2811 | 2350 | 1358 |
| Icosapent Ethyl | 4089 | 3797 | 3440 | 2958 | 2509 | 1434 |

CI = confidence interval; HR = hazard ratio; No at risk = number of patients at risk.

Note: The curves were visually truncated at 5.7 years because a limited number of events occurred beyond that time point; all patient data were included in the analyses. Absolute risk reduction is based on the observed event rates of 17.0% for icosapent ethyl and 21.9% for placebo.

**Supplemental Figure II. Kaplan-Meier Curve for Time to Primary Composite Endpoint Excluding Elective Revascularizations that Occurred within 30 Days of Randomization.**

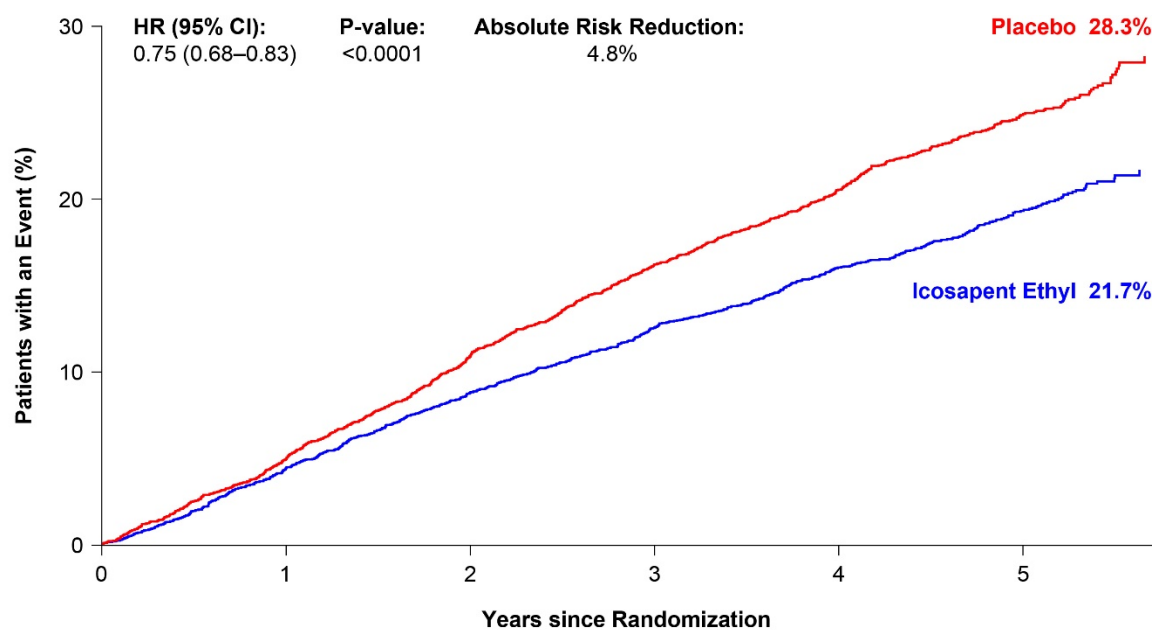

**No. at Risk**

|                 |      |      |      |      |      |      |
|-----------------|------|------|------|------|------|------|
| Placebo         | 4090 | 3747 | 3331 | 2809 | 2349 | 1358 |
| Icosapent Ethyl | 4089 | 3790 | 3433 | 2953 | 2505 | 1431 |

CI = confidence interval; HR = hazard ratio; No at risk = number of patients at risk.

Note: The curves were visually truncated at 5.7 years because a limited number of events occurred beyond that time point; all patient data were included in the analyses. Absolute risk reduction is based on the observed event rates of 17.2% for icosapent ethyl and 22.0% for placebo.

**Supplemental Figure III. Kaplan-Meier Curve for Time to Elective Revascularizations Excluding Elective Events that Occurred within 90 Days of Randomization.**

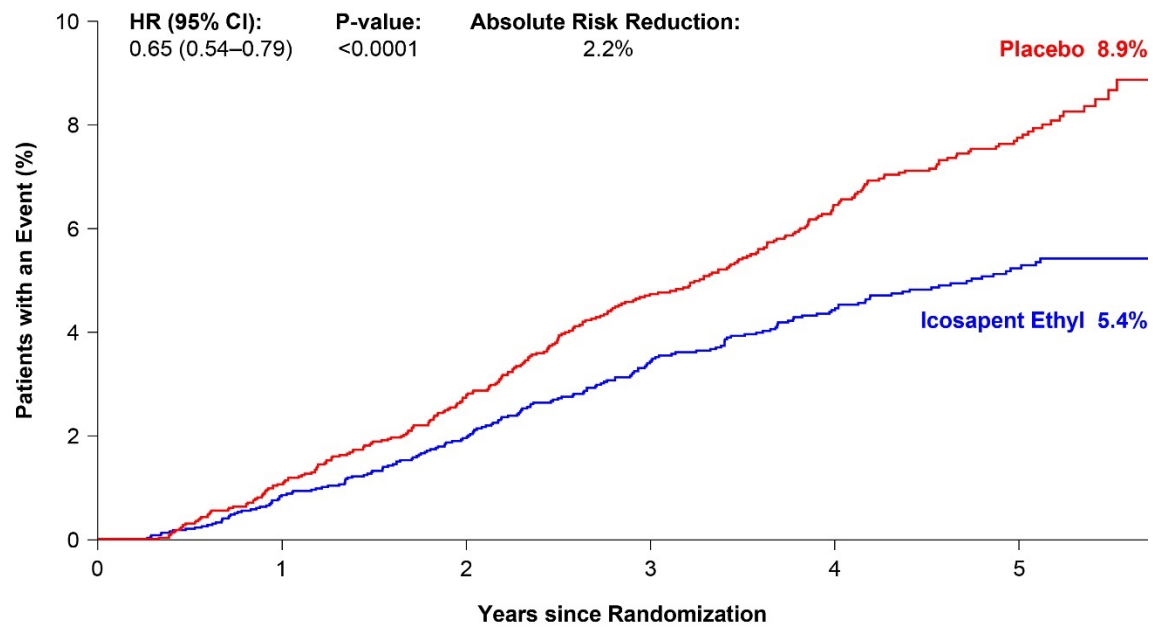

**No. at Risk**

|                 |      |      |      |      |      |      |
|-----------------|------|------|------|------|------|------|
| Placebo         | 4090 | 3871 | 3570 | 3093 | 2630 | 1540 |
| Icosapent Ethyl | 4089 | 3899 | 3629 | 3172 | 2733 | 1600 |

CI = confidence interval; HR = hazard ratio; No at risk = number of patients at risk.

Note: The curves were visually truncated at 5.7 years because a limited number of events occurred beyond that time point; all patient data were included in the analyses. Absolute risk reduction is based on the observed event rates of 4.5% for icosapent ethyl and 6.6% for placebo.

**Supplemental Figure IV. Kaplan-Meier Curve for Time to Elective Revascularization Excluding Elective Events that Occurred within 30 Days of Randomization.**

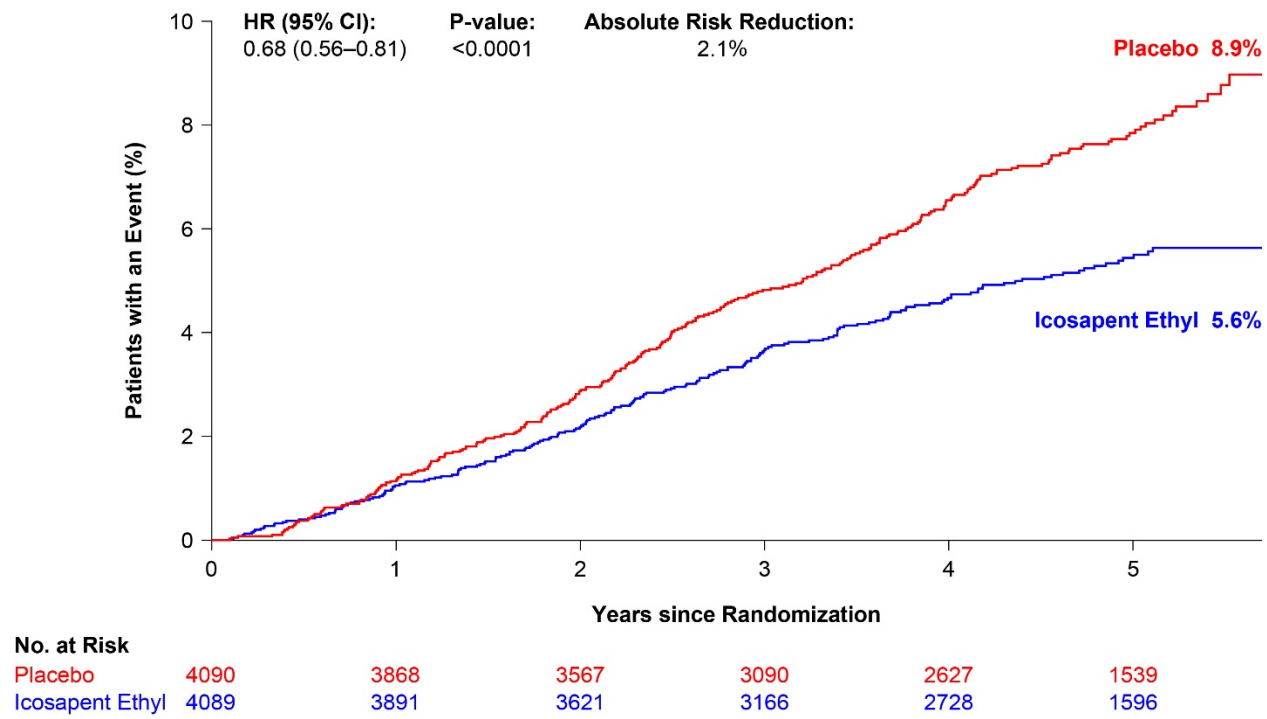

CI = confidence interval; HR = hazard ratio; No at risk = number of patients at risk.  
 Note: The curves were visually truncated at 5.7 years because a limited number of events occurred beyond that time point; all patient data were included in the analyses. Absolute risk reduction is based on the observed event rates of 4.6% for icosapent ethyl and 6.7% for placebo.

## Supplemental Figure V. Time to Revascularization for the ITT Population and by Baseline Characteristics Subgroups.

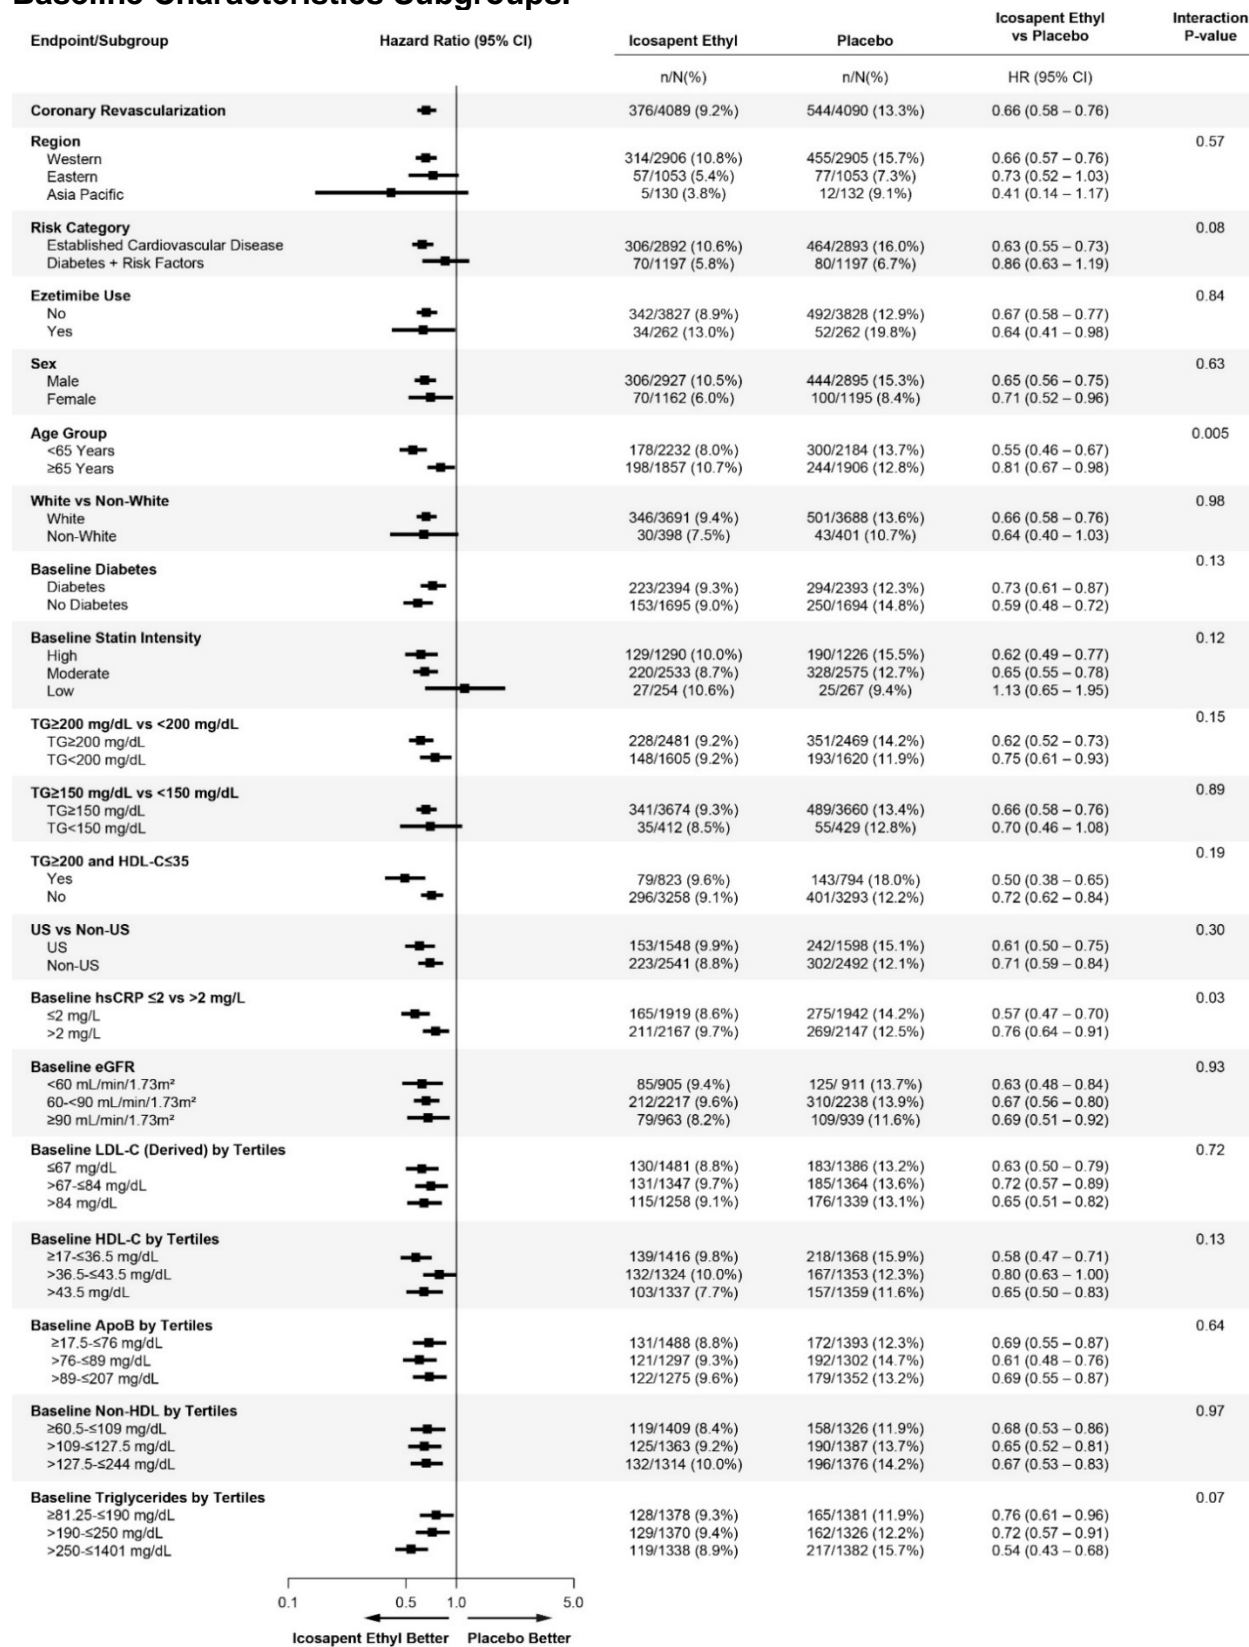

ApoB = apolipoprotein B; CI = confidence interval; eGFR = estimated glomerular filtration rate; HDL-C = high density lipoprotein cholesterol; hsCRP = high-sensitivity C-reactive protein; TG = triglycerides; US = United States.

**Supplemental Figure VI. Distribution of First and Subsequent Coronary Revascularization Events in the Full Dataset for Patients Randomized 1:1 to Icosapent Ethyl Versus Placebo.**

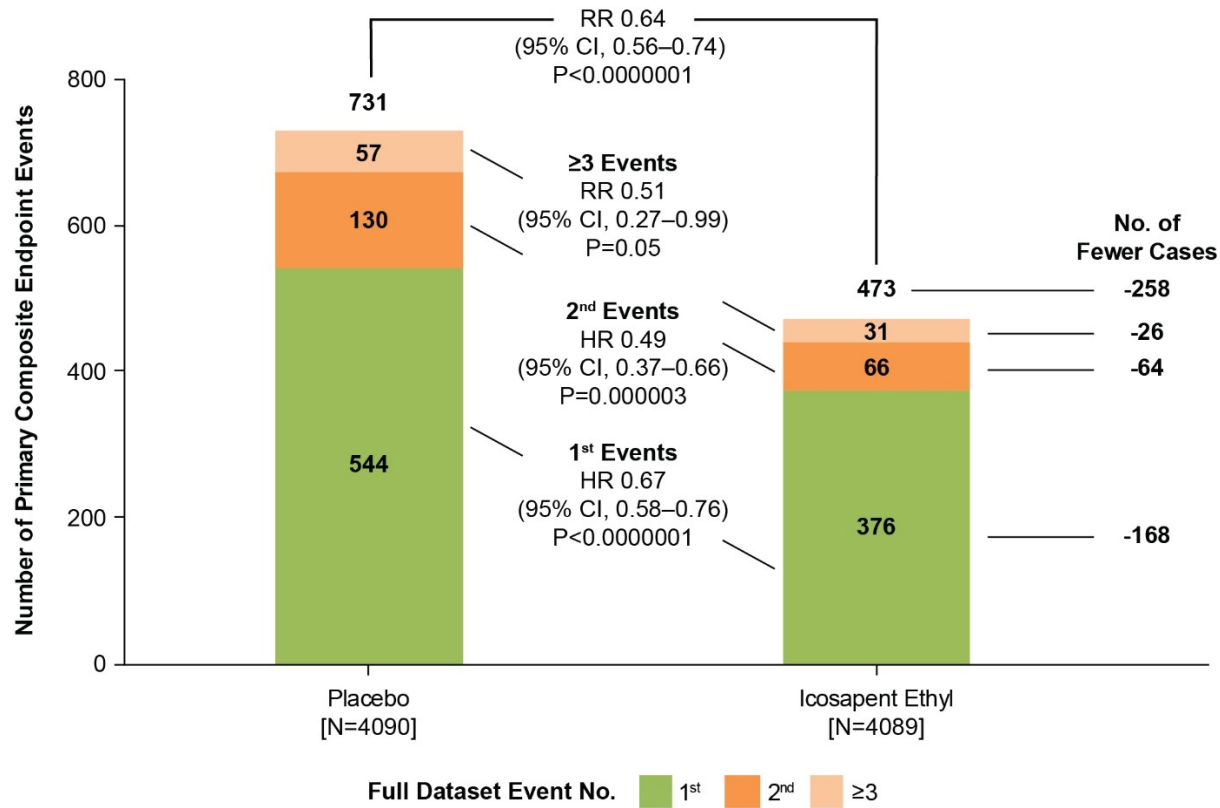

Hazard ratios (HRs) and 95% confidence intervals (CIs) for between group comparisons were generated using Li-Lagakos-modified Wei-Lin-Weissfeld method for first and second event categories. Rate ratio (RR) and 95% CI for group comparisons used a negative binomial model for additional events beyond first and second occurrences, i.e., third event or more and overall treatment comparison.

**Supplemental Figure VII. Comparison of relative risk reductions in revascularization in major clinical trials.**

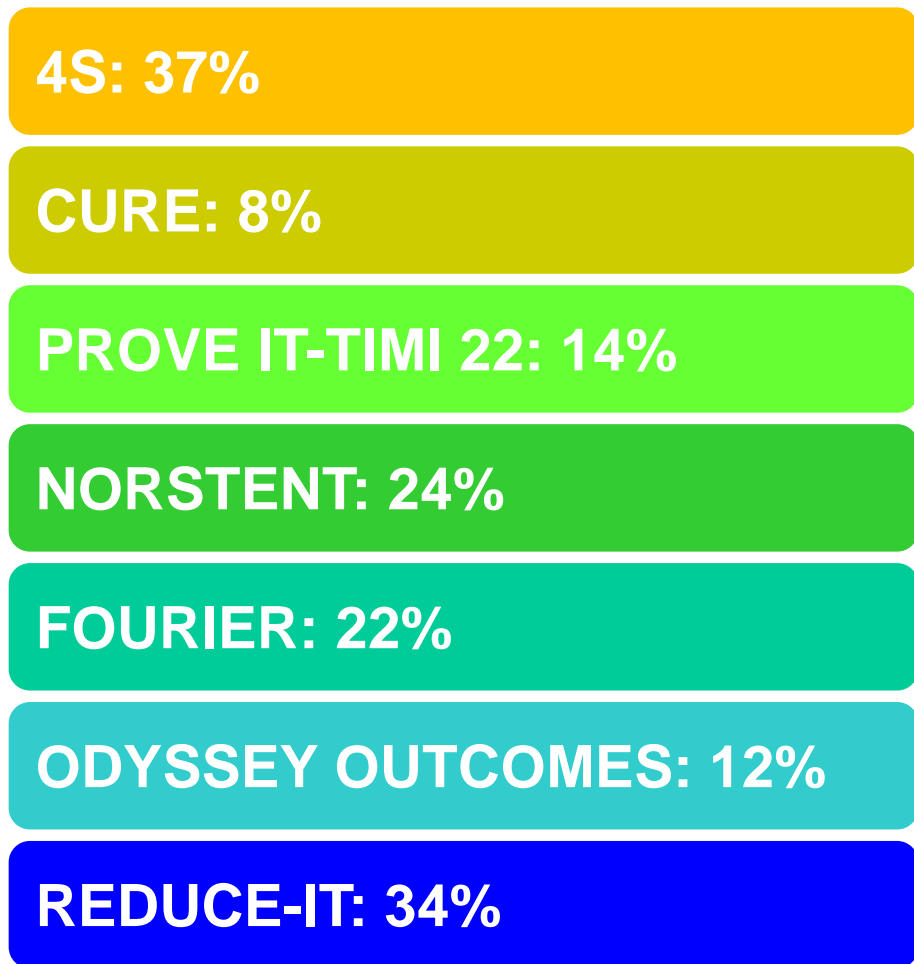

Revascularization was defined as “coronary intervention” or “coronary revascularization” in 4S, NORSTENT, FOURIER, and REDUCE-IT, “revascularization” in PROVE IT-TIMI 22, “revascularization procedure” in CURE, and “ischemia-driven revascularization” in ODYSSEY OUTCOMES.
